# Supplementary material for: Reaction between a haemoglobin model compound and hydrosulphide in aqueous solution
Source: Royal Society of Chemistry journal article supplement (doi:10.1039/c5cc00057b), 2015-01-01
Supplement: c5cc00057b1.pdf [file c5cc00057b1.pdf]

Supplementary Information for:

Reaction between a haemoglobin model compound and hydrogen sulfide in aqueous solution

Kenji Watanabe,<sup>a,\*</sup> Toshikane Suzuki,<sup>b</sup> Hiroaki Kitagishi,<sup>b</sup> Koji Kano<sup>b,\*</sup>

<sup>a</sup> *Graduate School of Pharmaceutical Sciences, Kyushu University, Fukuoka 812-8582, Japan. E-mail: kwatanabe@phar.kyushu-u.ac.jp*

<sup>b</sup> *Department of Molecular Chemistry and Biochemistry, Faculty of Science and Engineering, Doshisha University, Kyotanabe, Kyoto 610-0321, Japan. E-mail: kojikano1223@gmail.com*

## Instruments.

UV-Vis absorption spectra were measured using a Shimadzu UV-2400 spectrophotometer. Electron paramagnetic resonance (EPR) spectra were recorded on a JES-TE200 ESR system (JEOL Ltd., Tokyo, Japan). F-52 pH meter (Horiba Ltd., Kyoto, Japan) was used for pH measurements.

## Materials.

Water was distilled by Yamato Auto Still Glass Model WG250, and further purified by Millipore Simpact 1. NaSH (100 %) was purchased from Strem Chem. Inc. and was used as received. CO (99.999 %), O<sub>2</sub> (99.999 %) and argon (99.999 %) gasses were purchased from Sumitomo Seika Chemicals. HemoCD3 was prepared as described in a previous study.<sup>1</sup> All other reagents were purchased and used as received.

## Preparation of NaSH solution.

A solution of NaSH was freshly prepared in the globe box under argon atmosphere. Deoxidized aqueous phosphate buffered solutions were prepared by three freeze-pump thaw cycles and brought into the globe box. The concentration of the NaSH aqueous solution was determined by iodometric titration:<sup>2</sup> 10 mL of aqueous NaSH solution was combined with 5 mL of aqueous I<sub>2</sub> solution (0.05 M) containing appropriate amount of KI (0.1 M) and starch (solution A). Then, aqueous Na<sub>2</sub>S<sub>2</sub>O<sub>3</sub> solution (0.1 M) was titrated for the solution A. The point where the blue solution turned colourless was considered to be the end point of the titration.

Redox reaction between I<sub>2</sub> and I<sup>-</sup> is shown in Eq 1.

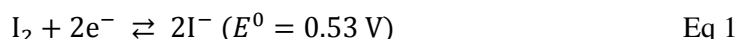

Equilibrium between I<sub>2</sub> and I<sub>3</sub><sup>-</sup> in the presence of KI is shown in Eq 2.

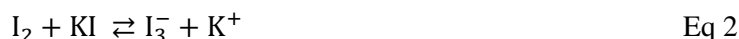

NaSH and Na<sub>2</sub>S<sub>2</sub>O<sub>3</sub> reduce I<sub>2</sub> (Eq 3 and 4).

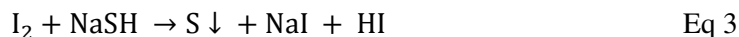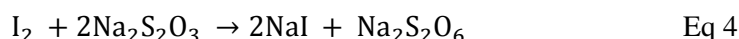

Therefore, the initial concentration of NaSH ([NaSH]<sub>0</sub>) in solution A is expressed as Eq 5. [I<sub>2</sub>]<sub>0</sub> and [I<sub>3</sub><sup>-</sup>]<sub>0</sub> represent the initial concentrations of I<sub>2</sub> and I<sub>3</sub><sup>-</sup>, respectively, in solution A. [I<sub>2</sub>] and [I<sub>3</sub><sup>-</sup>] represent the final concentration of I<sub>2</sub> and I<sub>3</sub><sup>-</sup>, respectively, in solution A, where NaSH is fully consumed.

$$[\text{NaSH}]_0 = ([\text{I}_2]_0 + [\text{I}_3^-]_0) - ([\text{I}_2] + [\text{I}_3^-]) \quad \text{Eq 5}$$

[I<sub>2</sub>] and [I<sub>3</sub><sup>-</sup>] are expressed as shown in Eq 6,

$$[\text{I}_2] + [\text{I}_3^-] = x \cdot [\text{Na}_2\text{S}_2\text{O}_3] / 2v \quad \text{Eq 6}$$

where [Na<sub>2</sub>S<sub>2</sub>O<sub>3</sub>], x, and v represent the concentration of the aqueous Na<sub>2</sub>S<sub>2</sub>O<sub>3</sub> solution, titrated volume of Na<sub>2</sub>S<sub>2</sub>O<sub>3</sub> solution, and the volume of solution A.

Eqs 5 and 6 are combined leading to Eq 7, which gives the [NaSH]<sub>0</sub> of the solution A.

$$[\text{NaSH}]_0 = ([\text{I}_2]_0 + [\text{I}_3^-]_0) - x \cdot [\text{Na}_2\text{S}_2\text{O}_3] / 2v \quad \text{Eq 7}$$

1. K. Watanabe, H. Kitagishi and K. Kano, *Angew. Chem. Int. Ed.*, 2013, **52**, 6894-6897.
2. Hujii, H. *Bunsekikagaku*, 1972, **21**, 1574-1579.

Structures of Py3OCD, Fe(III)TPPS and met-hemoCD3.

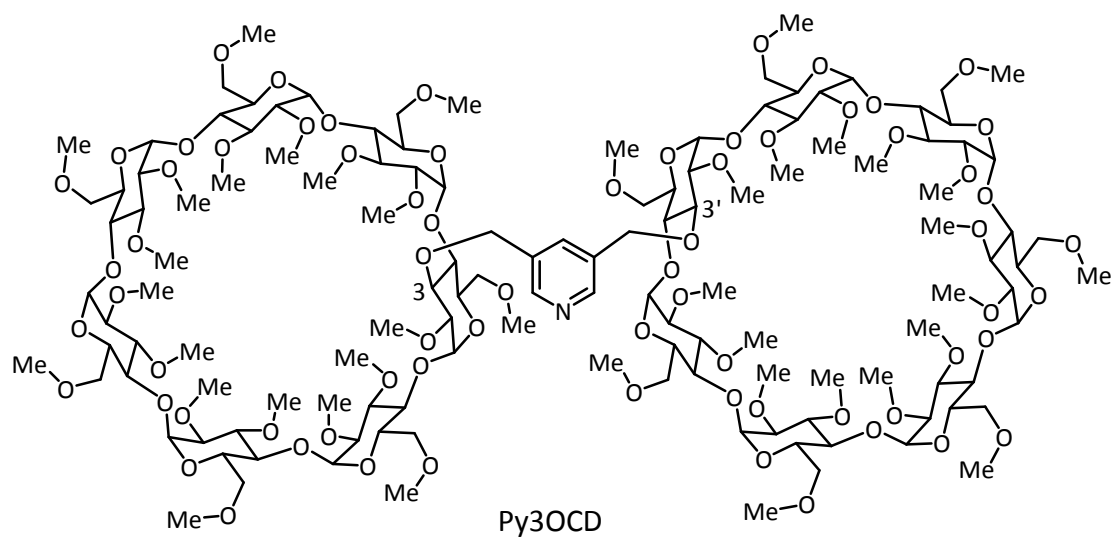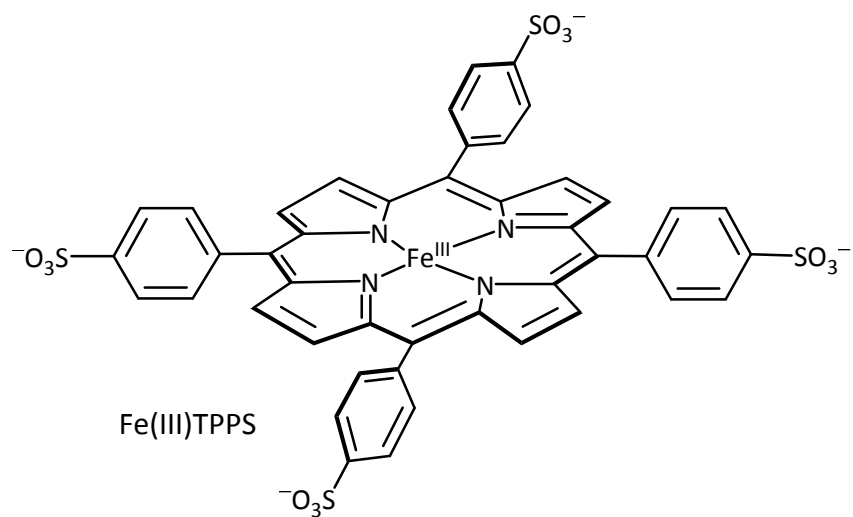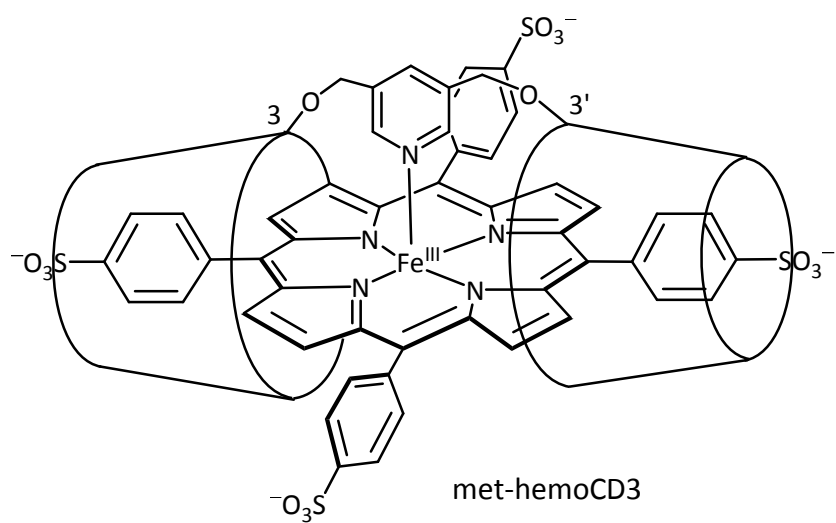

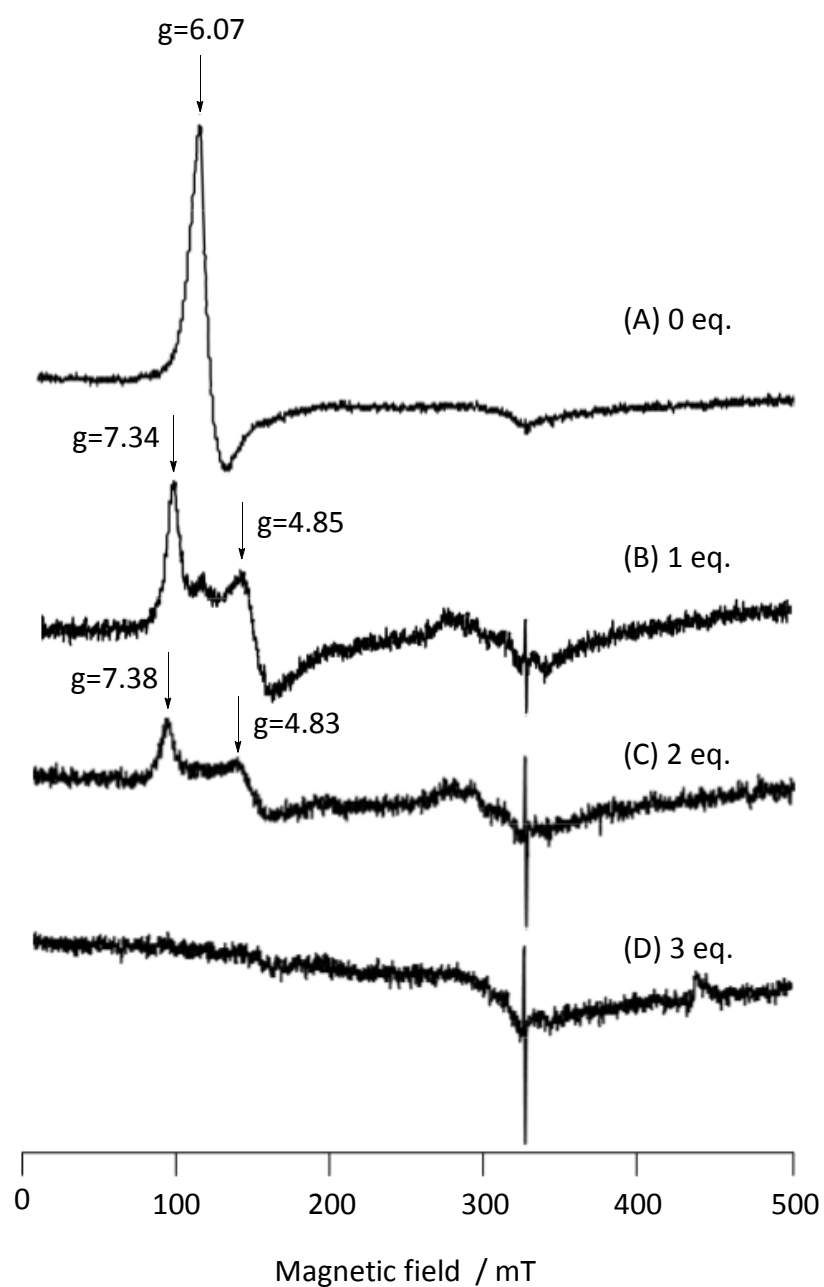

**Fig. S1** EPR spectra of the Fe(III)TPPS/(TMe-β-CD)<sub>2</sub> complex ( $5.0 \times 10^{-4}$  M) in the presence of various amounts of NaSH (0 eq. (A); 1 eq. (B); 2 eq. (C); 3 eq. (D)) in phosphate buffer at pH 6 and 77 K.

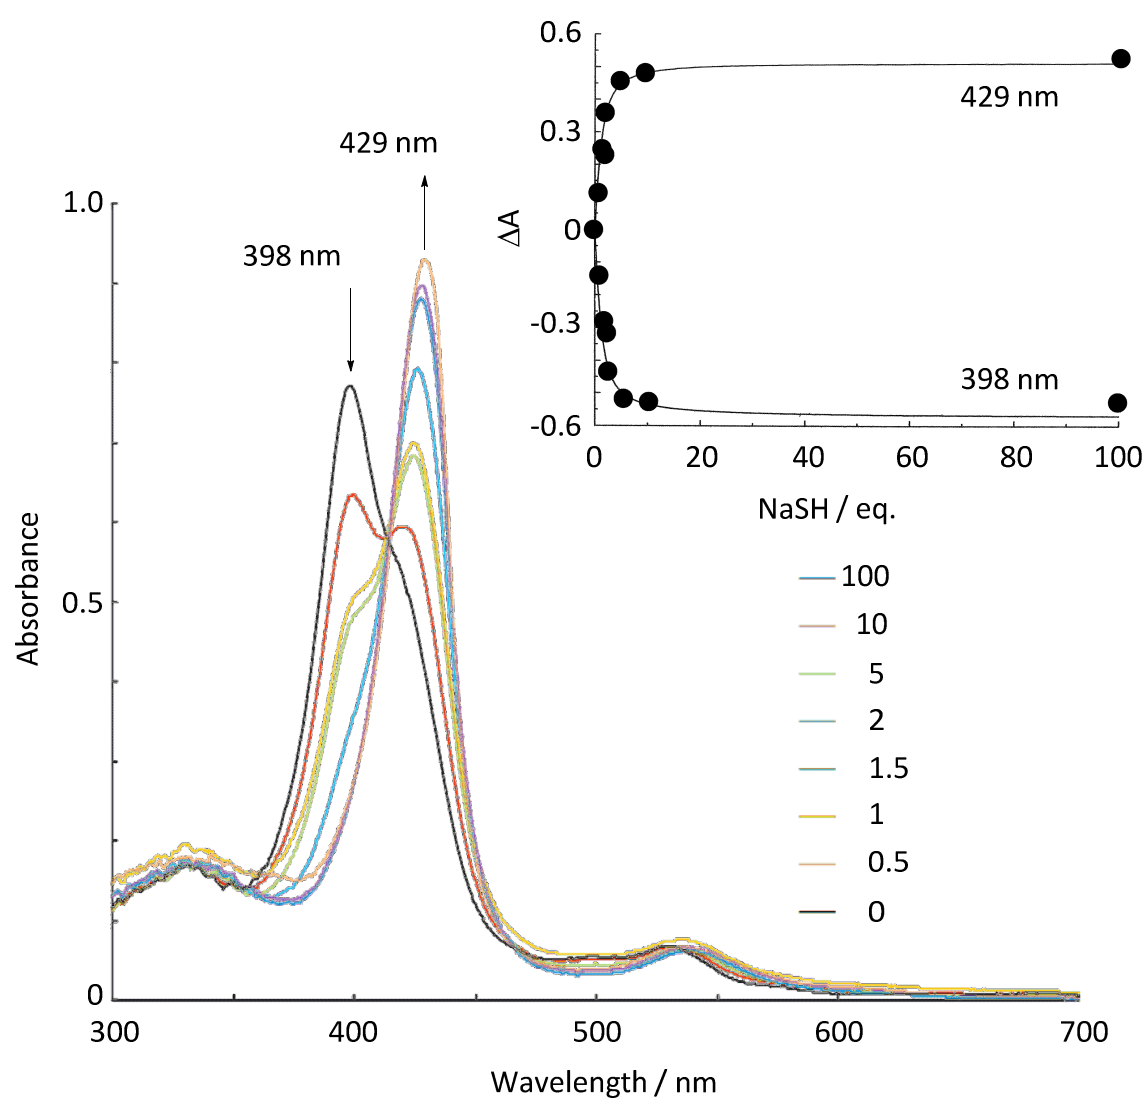

**Fig. S2** UV-Vis absorption spectral changes of met-hemoCD3 ( $5 \times 10^{-6}$  M) upon addition of NaSH in phosphate buffer at pH 6 and 25 °C.

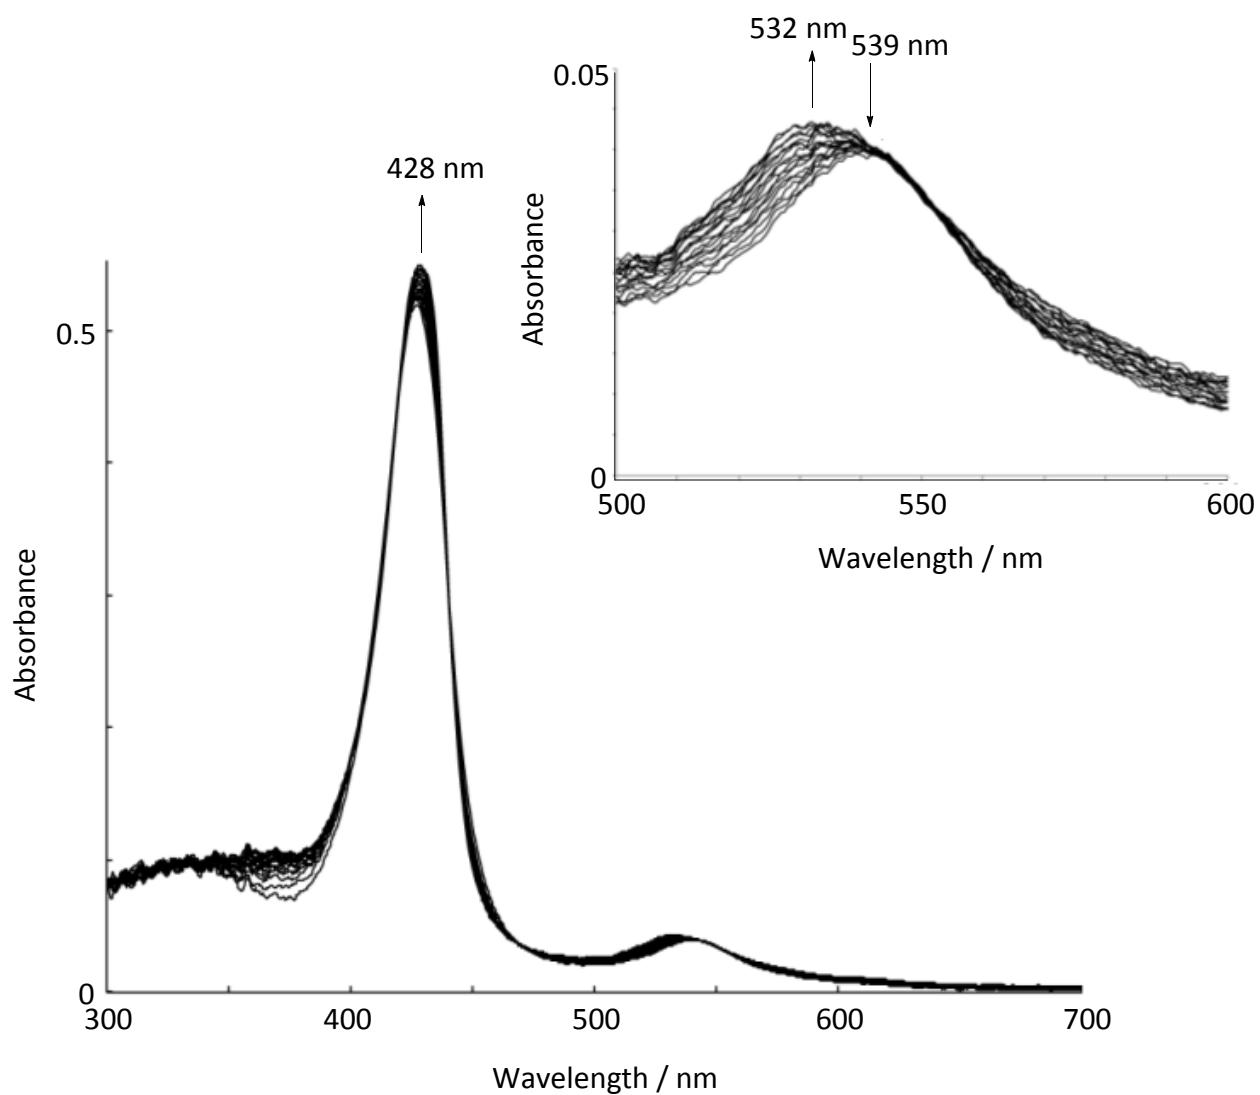

**Fig. S3** Progressive absorption spectral changes during spontaneous reduction of (SH<sup>-</sup>)-met-hemoCD3 ([met-hemoCD3 =  $5.0 \times 10^{-6}$  M]; [NaSH] =  $5.0 \times 10^{-5}$  M) to Fe(II)-hemoCD3 in deoxidised phosphate buffer at pH 7 and 25 °C. The spectra were recorded at 5-min intervals.

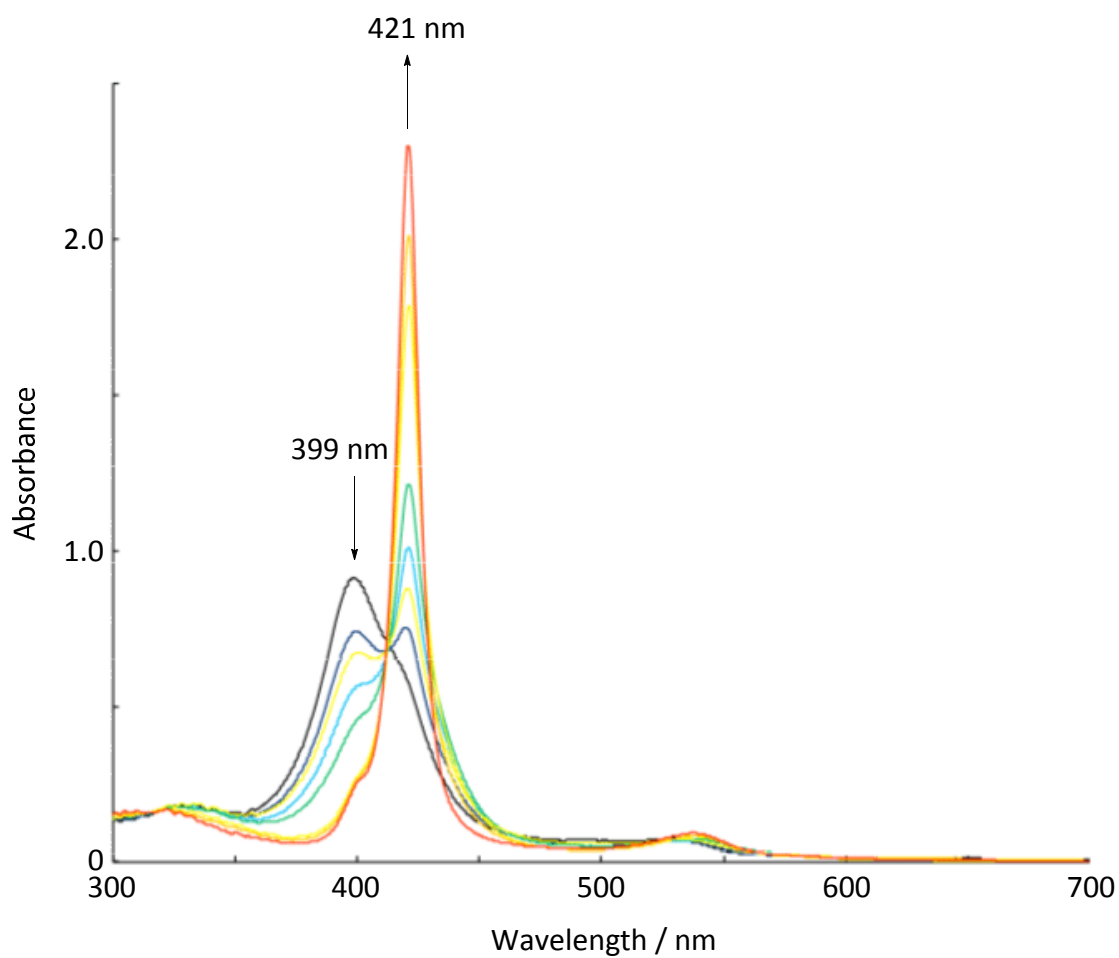

**Fig. S4** UV-Vis absorption spectral changes of met-hemoCD3 ( $5 \times 10^{-6}$  M) upon addition of NaSH (0-100 eq.) in phosphate buffer at pH 6 and 25 °C under CO atmosphere.
